# Supplementary material
Source: MDPI journal article supplement (https://www.mdpi.com/2076-3263/13/4/108)
Supplement: s1 [file s1]

Supplementary Materials

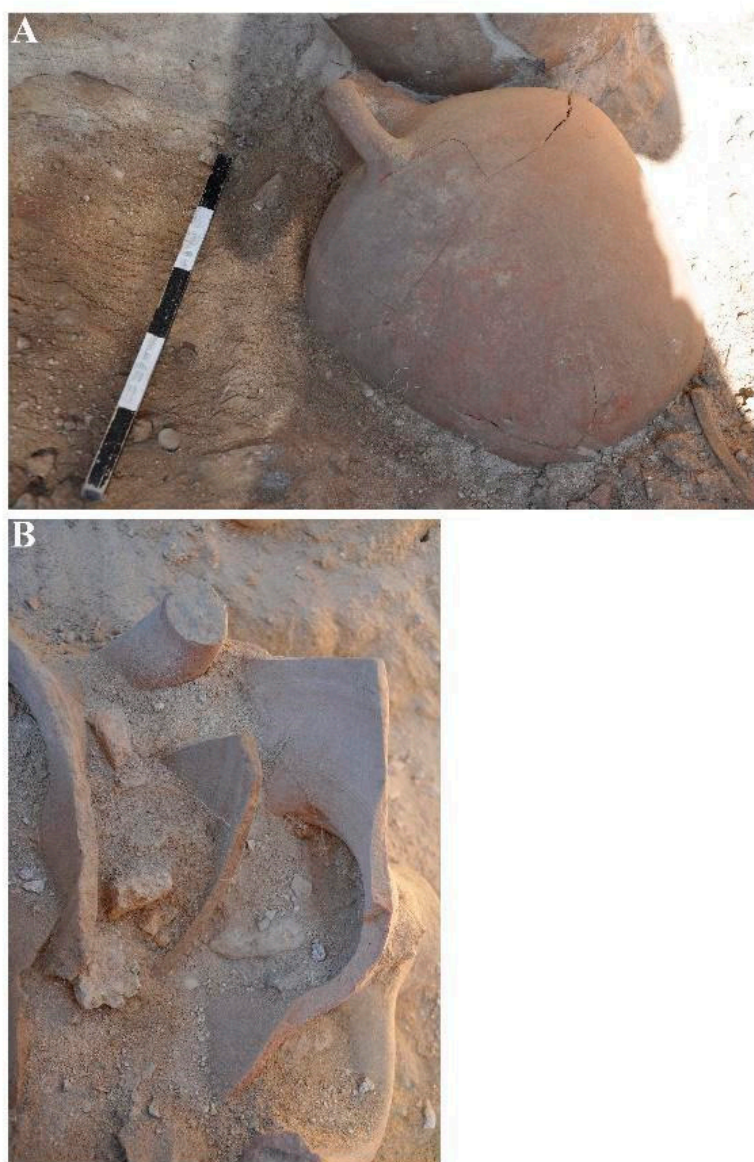

**Figure S1. Umayyad findings in eastern warehouse. (A-B)** Broken amphorae along the walls of a side room of the eastern warehouse, dating to the Umayyad period.

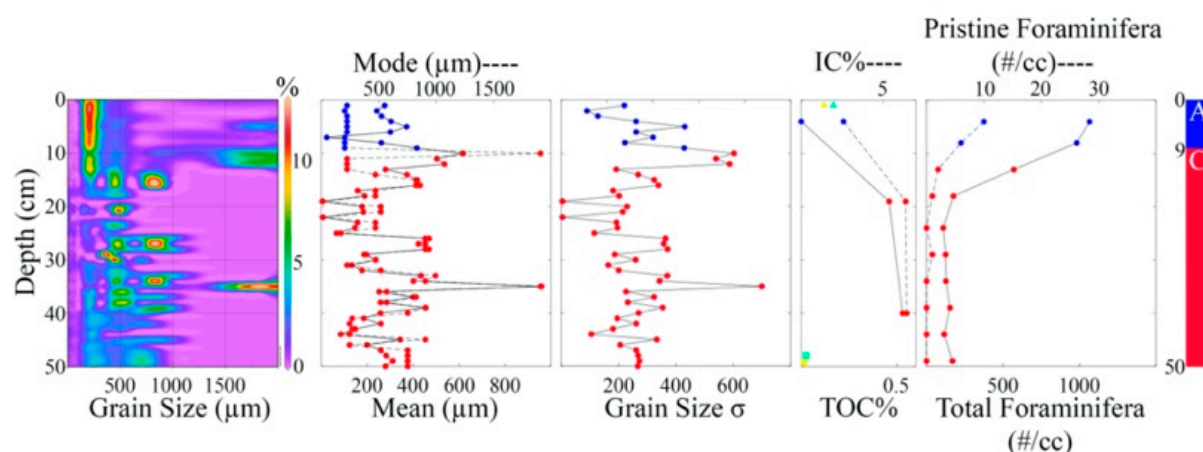

**Figure S2. Core LL16 C2 results.** Grain size distribution with depth in the core (1cm resolution) presented as a contour map (Ocean Data View ‘ODV’ Version 5.5.2 (Schlitzer, 2021)) as well as in conventional profiles (mean, mode, standard deviation). TOC and IC values (%) of a representative set of samples are shown as a profile for Core C2, reference samples are shown in squares (TOC) and triangles (IC) to show their comparative values to the core (yellow= aqueduct beach sandramp; aquamarine=shallow marine (-5m depth), see **Figure 1** for specific locations). Total and pristine foraminiferal abundances are shown plotted by core depth, sampling resolution of 5cm. The far right core illustration provides the thickness of each unit to scale, and the colors of the data points correspond with visually recognizable units.

**Table S1. Raw data for all sediment samples analyzed.** For all samples, type indicated by corresponding color, raw data from all analyses used is given.

|                  |            |            |            |            |            |            |            |            |           |           |            |            |            |           |
|------------------|------------|------------|------------|------------|------------|------------|------------|------------|-----------|-----------|------------|------------|------------|-----------|
| Sample           | CJ_000001  | CJ_001002  | CJ_002003  | CJ_003004  | CJ_004005  | CJ_005006  | CJ_006007  | CJ_007008  | CJ_008009 | CJ_009010 | CJ_010011  | CJ_011012  | CJ_012013  | CJ_013014 |
| Color            |            |            |            |            |            |            |            |            |           |           |            |            |            |           |
| Mean             | 240.791    | 254.041    | 242.96     | 245.042    | 240.925    | 240.889    | 241.367    | 239.777    | 246.625   | 241.789   | 255.099    | 244.023    | 242.35     | 242.958   |
| Median           | 226.797    | 232.109    | 226.141    | 228.769    | 225.2      | 224.886    | 225.867    | 224.557    | 228.388   | 225.241   | 233.229    | 226.497    | 224.284    | 225.605   |
| Mode             | 223.4      | 223.4      | 223.4      | 223.4      | 223.4      | 223.4      | 223.4      | 223.4      | 223.4     | 223.4     | 223.4      | 223.4      | 223.4      | 223.4     |
| Mean/Median      | 1.0617     | 1.09449    | 1.07437    | 1.07113    | 1.06983    | 1.07116    | 1.06862    | 1.06778    | 1.07985   | 1.07347   | 1.09377    | 1.07738    | 1.08055    | 1.07692   |
| S.D.             | 92.5875    | 94.9928    | 85.162     | 84.6407    | 82.7957    | 83.2711    | 81.6974    | 80.8502    | 87.6177   | 82.7428   | 95.1353    | 85.4024    | 85.1897    | 83.8632   |
| S.D./Median      | 0.40823953 | 0.40925944 | 0.37658806 | 0.36998326 | 0.36765409 | 0.37028139 | 0.36170578 | 0.36004311 | 0.3836353 | 0.3673523 | 0.40790511 | 0.37705753 | 0.37982959 | 0.3717258 |
| Variance         | 8572.44    | 9023.63    | 7252.57    | 7164.04    | 6855.13    | 6934.07    | 6674.46    | 6536.75    | 7676.87   | 6846.37   | 9050.73    | 7293.57    | 7257.28    | 7033.04   |
| C.V.             | 38.4514    | 37.3927    | 35.0519    | 34.5413    | 34.3658    | 34.5682    | 33.8478    | 33.7189    | 35.5268   | 34.221    | 37.2935    | 34.9978    | 35.1515    | 34.5176   |
| Skewness         | 0.849823   | 1.49583    | 1.48539    | 1.29419    | 1.38226    | 1.48347    | 1.32555    | 1.36833    | 1.46002   | 1.43052   | 1.34421    | 1.42646    | 1.50872    | 1.43506   |
| Kurtosis         | 2.15118    | 2.68166    | 3.40577    | 2.44871    | 2.939      | 3.49924    | 2.6611     | 2.92917    | 2.96911   | 2.85181   | 2.05892    | 2.70824    | 2.93319    | 2.70406   |
| Foraminifera/cc  |            |            |            | 1190       |            |            |            |            | 1357      |           |            |            |            | 1011      |
| Pristine/cc      |            |            |            | 22         |            |            |            |            | 10        |           |            |            |            | 16        |
| TOC%             |            |            |            |            |            |            |            |            |           |           |            |            | 0          |           |
| IC%              |            |            |            |            |            |            |            |            |           |           |            |            | 2.62       |           |
| IRSL_net         | 94.773     |            |            |            | 107.699    |            |            | 114.987    |           |           | 120.001    |            |            |           |
| IRSL_err         | 9.814326   |            |            |            | 10.45653   |            |            | 10.79643   |           |           | 11.02311   |            |            |           |
| IRSL_front       | 24.835     |            |            |            | 30.323     |            |            | 32.093     |           |           | 32.403     |            |            |           |
| IRSL_front_Error | 9.774815   |            |            |            | 10.41725   |            |            | 10.75988   |           |           | 10.98886   |            |            |           |
| IRSL_depletion   | 1.7102     |            |            |            | 1.783783   |            |            | 1.774314   |           |           | 1.739811   |            |            |           |
| IRSL_dep_err     | 0.367464   |            |            |            | 0.361445   |            |            | 0.347375   |           |           | 0.332288   |            |            |           |
| OSL_net          | 436.037    |            |            |            | 405.108    |            |            | 369.675    |           |           | 422.741    |            |            |           |
| OSL_err          | 20.9428    |            |            |            | 20.19673   |            |            | 19.29484   |           |           | 20.62467   |            |            |           |
| OSL_front        | 213.015    |            |            |            | 186.118    |            |            | 164.795    |           |           | 187.991    |            |            |           |
| OSL_front_err    | 20.91217   |            |            |            | 20.16204   |            |            | 19.26092   |           |           | 20.59269   |            |            |           |
| OSL_depletion    | 2.91026    |            |            |            | 2.699785   |            |            | 2.608698   |           |           | 2.601627   |            |            |           |
| OSL_dep_err      | 0.32098    |            |            |            | 0.303632   |            |            | 0.304747   |           |           | 0.283855   |            |            |           |
| IRSL/OSL         | 0.217351   |            |            |            | 0.265853   |            |            | 0.311049   |           |           | 0.283864   |            |            |           |

|            | CJ_014015 | CJ_015016  | CJ_016017  | CJ_017018 | CJ_018019   | CJ_019020 | CJ_020021 | CJ_021022  | CJ_022023 | CJ_023024 | CJ_024025 | CJ_025026  | CJ_026027  | CJ_027028  | CJ_028029  | CJ_029030 |
|------------|-----------|------------|------------|-----------|-------------|-----------|-----------|------------|-----------|-----------|-----------|------------|------------|------------|------------|-----------|
|            |           |            |            |           |             |           |           |            |           |           |           |            |            |            |            |           |
| 259.314    | 247.699   | 252.235    | 241.388    | 245.047   | 244.857     | 269.963   | 254.876   | 244.289    | 229.576   | 236.847   | 237.31    | 233.946    | 231.972    | 237.281    | 238.468    |           |
| 227.633    | 228.548   | 230.75     | 222.025    | 227.874   | 225.286     | 236.453   | 228.685   | 221.636    | 212.819   | 218.789   | 220.6     | 218.647    | 216.433    | 222.103    | 221.155    |           |
| 223.4      | 223.4     | 223.4      | 223.4      | 223.4     | 223.4       | 223.4     | 223.4     | 203.505    | 203.505   | 203.505   | 223.4     | 203.505    | 203.505    | 203.505    | 223.4      | 223.4     |
| 1.09123    | 1.0838    | 1.09311    | 1.08721    | 1.07536   | 1.08687     | 1.14172   | 1.11453   | 1.10221    | 1.07874   | 1.08254   | 1.07575   | 1.06997    | 1.0718     | 1.06833    | 1.07829    |           |
| 96.3894    | 90.0201   | 92.8708    | 87.5773    | 85.0156   | 91.0697     | 121.129   | 101.805   | 93.9929    | 80.2523   | 84.0078   | 82.0524   | 77.8853    | 78.459     | 78.9918    | 84.3717    |           |
| 0.40562296 | 0.3938783 | 0.40247367 | 0.39444792 | 0.3730816 | 0.404240388 | 0.5122752 | 0.4451757 | 0.42408679 | 0.3770918 | 0.3839672 | 0.371951  | 0.35621481 | 0.36250941 | 0.35565391 | 0.38150483 |           |
| 9290.91    | 8103.62   | 8624.99    | 7669.78    | 7227.65   | 8293.69     | 14672.3   | 10364.3   | 8834.67    | 6440.43   | 7057.31   | 6732.59   | 6066.13    | 6155.82    | 6239.71    | 7118.59    |           |
| 37.171     | 36.3426   | 36.8191    | 36.2806    | 34.6936   | 37.193      | 44.8688   | 39.943    | 38.4761    | 34.9567   | 35.4693   | 34.5761   | 33.292     | 33.8226    | 33.2904    | 35.3807    |           |
| 1.30846    | 1.41198   | 1.50497    | 1.63744    | 1.3897    | 1.68115     | 1.77798   | 1.56693   | 1.71809    | 1.70328   | 1.61582   | 1.72189   | 1.61631    | 1.69898    | 1.5303     | 1.75165    |           |
| 1.96881    | 2.64865   | 2.67953    | 3.46175    | 2.74674   | 4.09465     | 3.79177   | 2.64295   | 3.48128    | 4.09149   | 3.42547   | 4.12703   | 3.78044    | 4.18942    | 3.46457    | 4.48827    |           |
|            |           |            |            | 947       |             |           |           |            | 944       |           |           |            |            | 1376       |            |           |
|            |           |            |            | 22        |             |           |           |            | 32        |           |           |            |            | 6          |            |           |
|            |           |            |            |           |             |           |           |            |           | 0.03      |           |            |            |            |            |           |
|            |           |            |            |           |             |           |           |            |           | 2.06      |           |            |            |            |            |           |
|            | 121.335   |            |            |           |             | 151.895   |           |            |           |           | 142.434   |            |            |            |            |           |
|            | 11.09139  |            |            |           |             | 12.40963  |           |            |           |           | 12.00242  |            |            |            |            |           |
|            | 31.433    |            |            |           |             | 41.721    |           |            |           |           | 39.702    |            |            |            |            |           |
|            | 11.05337  |            |            |           |             | 12.36717  |           |            |           |           | 11.96854  |            |            |            |            |           |
|            | 1.699273  |            |            |           |             | 1.757366  |           |            |           |           | 1.772924  |            |            |            |            |           |
|            | 0.321963  |            |            |           |             | 0.298968  |           |            |           |           | 0.311423  |            |            |            |            |           |
|            | 421.877   |            |            |           |             | 484.28    |           |            |           |           | 462.617   |            |            |            |            |           |
|            | 20.60255  |            |            |           |             | 22.07496  |           |            |           |           | 21.57343  |            |            |            |            |           |
|            | 191.917   |            |            |           |             | 217.674   |           |            |           |           | 208.535   |            |            |            |            |           |
|            | 20.57112  |            |            |           |             | 22.04069  |           |            |           |           | 21.54101  |            |            |            |            |           |
|            | 2.669134  |            |            |           |             | 2.632926  |           |            |           |           | 2.641478  |            |            |            |            |           |
|            | 0.293207  |            |            |           |             | 0.269129  |           |            |           |           | 0.276416  |            |            |            |            |           |
|            | 0.287608  |            |            |           |             | 0.313651  |           |            |           |           | 0.307888  |            |            |            |            |           |

|             |            |            |           |            |            |            |           |            |           |           |            |            |           |           |            |
|-------------|------------|------------|-----------|------------|------------|------------|-----------|------------|-----------|-----------|------------|------------|-----------|-----------|------------|
| CJ_030031   | CJ_031032  | CJ_032033  | CJ_033034 | CJ_034035  | CJ_035036  | CJ_036037  | CJ_037038 | CJ_038039  | CJ_039040 | CJ_040041 | CJ_041042  | CJ_042043  | CJ_043044 | CJ_044045 | CJ_045046  |
|             |            |            |           |            |            |            |           |            |           |           |            |            |           |           |            |
| 235.053     | 242.205    | 234.985    | 236.015   | 320.394    | 239.376    | 266.893    | 329.761   | 255.065    | 273.271   | 364.316   | 400.924    | 538.877    | 383.482   | 373.474   | 632.711    |
| 219.408     | 222.58     | 217.892    | 215.369   | 224.067    | 217.87     | 220.484    | 229.12    | 217.341    | 220.47    | 246.895   | 353.648    | 382.239    | 265.099   | 256.598   | 431.613    |
| 223.4       | 223.4      | 203.505    | 203.505   | 203.505    | 203.505    | 223.4      | 223.4     | 203.505    | 203.505   | 223.4     | 905.126    | 905.126    | 905.126   | 905.126   | 223.4      |
| 1.07131     | 1.08817    | 1.07845    | 1.09586   | 1.4299     | 1.09871    | 1.21049    | 1.43925   | 1.17357    | 1.23949   | 1.47559   | 1.13368    | 1.40979    | 1.44656   | 1.4548    | 1.46592    |
| 79.5776     | 89.1799    | 81.9173    | 93.6466   | 320.429    | 92.2953    | 219.8      | 324.136   | 205.304    | 227.703   | 339.802   | 352.973    | 490.129    | 329.939   | 311.269   | 538.758    |
| 0.362692336 | 0.40066448 | 0.37595368 | 0.4348193 | 1.43005887 | 0.42362556 | 0.99689773 | 1.4146997 | 0.94461698 | 1.0328072 | 1.3763017 | 0.99809132 | 1.28225796 | 1.2445879 | 1.2130609 | 1.24824322 |
| 6332.59     | 7953.05    | 6710.45    | 8769.68   | 102675     | 8518.42    | 48312.1    | 105064    | 42149.9    | 51848.6   | 115466    | 124590     | 240226     | 108860    | 96888.4   | 290260     |
| 33.8551     | 36.82      | 34.8606    | 39.6783   | 100.011    | 38.5566    | 82.3552    | 98.2942   | 80.4909    | 83.3249   | 93.2713   | 88.0398    | 90.9538    | 86.0378   | 83.3443   | 85.1507    |
| 1.63584     | 1.70863    | 1.64199    | 2.22287   | 3.34414    | 1.86865    | 3.55651    | 2.78808   | 4.23453    | 1.44656   | 1.12448   | 0.431764   | 0.980667   | 0.625245  | 0.733557  | 0.818277   |
| 4.07977     | 3.83004    | 3.67647    | 7.66532   | 10.9794    | 4.36713    | 15.7585    | 8.17777   | 25.8391    | 2.12544   | 0.385365  | -1.2415    | 0.151342   | -0.893524 | -0.63479  | -0.464778  |
|             |            | 998        |           |            |            | 998        |           | 938        |           |           |            |            | 413       |           |            |
|             |            | 6          |           |            |            | 10         |           | 3          |           |           |            |            | 0         |           |            |
|             |            |            |           |            |            | 0.04       |           |            |           |           |            |            |           | 0.36      |            |
|             |            |            |           |            |            | 3.38       |           |            |           |           |            |            |           | 4.92      |            |
| 154.553     |            |            |           |            | 101.06     |            |           |            |           | 71.382    |            |            |           |           |            |
| 12.50668    |            |            |           |            | 10.1262    |            |           |            |           | 8.548333  |            |            |           |           |            |
| 42.851      |            |            |           |            | 27.502     |            |           |            |           | 16.826    |            |            |           |           |            |
| 12.46936    |            |            |           |            | 10.0896    |            |           |            |           | 8.498706  |            |            |           |           |            |
| 1.767238    |            |            |           |            | 1.747764   |            |           |            |           | 1.616834  |            |            |           |           |            |
| 0.297981    |            |            |           |            | 0.364409   |            |           |            |           | 0.399018  |            |            |           |           |            |
| 503.593     |            |            |           |            | 371.173    |            |           |            |           | 222.697   |            |            |           |           |            |
| 22.51251    |            |            |           |            | 19.33497   |            |           |            |           | 14.99056  |            |            |           |           |            |
| 224.671     |            |            |           |            | 163.241    |            |           |            |           | 81.035    |            |            |           |           |            |
| 22.47672    |            |            |           |            | 19.30044   |            |           |            |           | 14.95684  |            |            |           |           |            |
| 2.610995    |            |            |           |            | 2.570138   |            |           |            |           | 2.144061  |            |            |           |           |            |
| 0.261251    |            |            |           |            | 0.298657   |            |           |            |           | 0.310319  |            |            |           |           |            |
| 0.306901    |            |            |           |            | 0.272272   |            |           |            |           | 0.320534  |            |            |           |           |            |

|           |           |           |            |           |           |           |            |            |           |            |           |           |           |           |           |
|-----------|-----------|-----------|------------|-----------|-----------|-----------|------------|------------|-----------|------------|-----------|-----------|-----------|-----------|-----------|
| 0.46047   | CJ_047048 | CJ_048049 | CJ_049050  | CJ_050051 | CJ_051052 | CJ_052053 | CJ_053054  | CJ_054055  | CJ_055056 | CJ_056057  | CJ_057058 | CJ_058059 | CJ_059060 | CJ_060061 | CJ_061062 |
|           |           |           |            |           |           |           |            |            |           |            |           |           |           |           |           |
| 610.564   | 647.943   | 356.207   | 302.792    | 299.678   | 608.773   | 505.056   | 569.976    | 518.487    | 479.136   | 528.41     | 425.819   | 360.281   | 633.138   | 544.96    | 722.932   |
| 325.181   | 378.095   | 251.863   | 239.083    | 232.545   | 351.164   | 263.872   | 282.302    | 261.166    | 256.036   | 282.189    | 248.93    | 232.568   | 444.663   | 308.971   | 526.032   |
| 223.4     | 1738.87   | 223.4     | 223.4      | 245.24    | 223.4     | 223.4     | 203.505    | 203.505    | 203.505   | 203.505    | 203.505   | 203.505   | 203.505   | 203.505   | 1584.02   |
| 1.87761   | 1.71371   | 1.41429   | 1.26648    | 1.28869   | 1.73359   | 1.91402   | 2.01903    | 1.98528    | 1.87136   | 1.87254    | 1.7106    | 1.54914   | 1.42386   | 1.76379   | 1.37431   |
| 581.076   | 589.263   | 319.902   | 250.281    | 254.523   | 553.832   | 521.103   | 557.278    | 535.383    | 491.887   | 528.456    | 442.387   | 375.613   | 523.814   | 530.879   | 622.253   |
| 1.786931  | 1.5585051 | 1.2701429 | 1.04683729 | 1.094511  | 1.5771321 | 1.9748325 | 1.97404907 | 2.04997205 | 1.9211634 | 1.87270234 | 1.7771542 | 1.6150674 | 1.1780022 | 1.7182163 | 1.1829185 |
| 337649    | 347230    | 102337    | 62640.6    | 64782     | 306730    | 271548    | 310558     | 286635     | 241953    | 279265     | 195706    | 141085    | 274381    | 281833    | 387199    |
| 95.1703   | 90.9436   | 89.8079   | 82.6577    | 84.9321   | 90.9751   | 103.177   | 97.7721    | 103.259    | 102.661   | 100.009    | 103.891   | 104.256   | 82.733    | 97.4162   | 86.0734   |
| 0.949347  | 0.807018  | 1.07237   | 1.01134    | 0.925197  | 0.949225  | 1.46224   | 1.15096    | 1.34895    | 1.54251   | 1.30476    | 2.00237   | 2.46795   | 0.926374  | 1.24124   | 0.526568  |
| -0.475655 | -0.732737 | 0.277359  | 0.40034    | 0.185282  | -0.40039  | 0.839616  | -0.044057  | 0.49985    | 1.2078    | 0.469206   | 3.07727   | 5.64554   | -0.270415 | 0.301505  | -1.14955  |
|           |           | 254       |            |           |           |           | 336        |            |           |            |           |           |           |           |           |
|           |           | 1         |            |           |           |           | 2          |            |           |            |           |           |           |           |           |
|           |           |           |            |           |           |           |            | 0.26       |           |            |           |           |           |           |           |
|           |           |           |            |           |           |           |            | 3.64       |           |            |           |           |           |           |           |
|           |           |           |            | 11.451    |           |           |            | 18.426     |           |            |           |           |           |           |           |
|           |           |           |            | 3.602083  |           |           |            | 4.451741   |           |            |           |           |           |           |           |
|           |           |           |            | 2.27      |           |           |            | 3.636      |           |            |           |           |           |           |           |
|           |           |           |            | 3.49471   |           |           |            | 4.372871   |           |            |           |           |           |           |           |
|           |           |           |            | 1.496403  |           |           |            | 1.491684   |           |            |           |           |           |           |           |
|           |           |           |            | 0.965248  |           |           |            | 0.737331   |           |            |           |           |           |           |           |
|           |           |           |            | 78.589    |           |           |            | 121.715    |           |            |           |           |           |           |           |
|           |           |           |            | 8.956618  |           |           |            | 11.11499   |           |            |           |           |           |           |           |
|           |           |           |            | 26.011    |           |           |            | 42.367     |           |            |           |           |           |           |           |
|           |           |           |            | 8.910948  |           |           |            | 11.0738    |           |            |           |           |           |           |           |
|           |           |           |            | 1.989425  |           |           |            | 2.067878   |           |            |           |           |           |           |           |
|           |           |           |            | 0.481746  |           |           |            | 0.403692   |           |            |           |           |           |           |           |
|           |           |           |            | 0.145707  |           |           |            | 0.151386   |           |            |           |           |           |           |           |

[illegible]

[illegible]

[illegible]

[illegible]

[illegible]

[illegible]

[illegible]



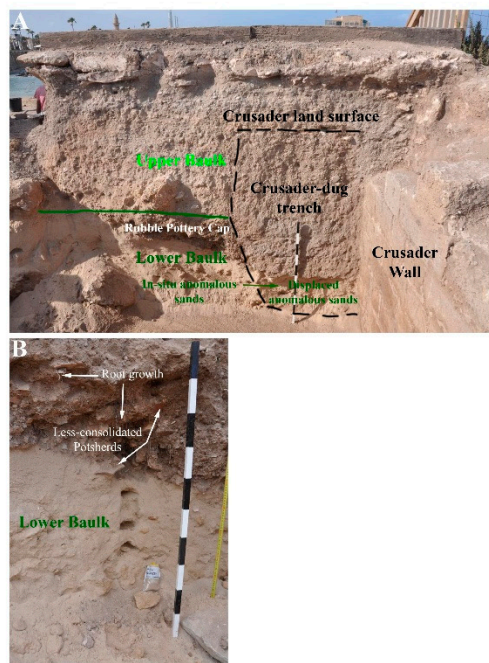

**Figure S3. Sampling the 'LL Southern Baulk' section, looking southwest.** (A) The lower section, consisting of clean sand, is outlined in dark green. This part of the construction fill shows an angle of repose from the east and abuts the Crusader wall on the west. (B) A close-up of the Lower Baulk shows the anomalous sands beneath a rubble cap with potsherds and exhibiting root growth. This baulk was sampled in ~5-15 cm intervals and bagged.

**Table S2. All possible earthquakes that fit the chronology.** A list of all earthquakes that could chronologically fit with the deposition of the anomalous unit, along with estimated strength, epicenter, and historical mentions of coastal flooding.

| Recorded Earthquake | Inferred Epicenter/Cause                                                                     | Estimated magnitude     | Evidence?                                                                                                                                            | Likely to have caused damage to southern Levant?                                                      |
|---------------------|----------------------------------------------------------------------------------------------|-------------------------|------------------------------------------------------------------------------------------------------------------------------------------------------|-------------------------------------------------------------------------------------------------------|
| 634 CE              | DSF?                                                                                         | 5.5                     | Several historical references (Theophanes (closest to event), Michael the Syrian, al-Makin, Abu'l Fara)                                              | Yes, damage reported in Jerusalem                                                                     |
| 659/660 CE          | DSF earthquake in Israeli section                                                            | 6.0-7.0                 | Several historical references; possible evidence in Dead Sea sediments                                                                               | Yes, damage reported in Jericho and Jerusalem                                                         |
| 746/749 CE          | DSF earthquake with epicenter on the Jericho segment between the Dead Sea and Sea of Galilee | 6.0-7.0, or greater     | Several historical references (Theophanes, Michael the Syrian); archaeological evidence; geological evidence; possible Dead Sea sedimentary evidence | Archaeological evidence of earthquake damage at Tiberias, Bet She'an, Caesarea Maritima, Ein Keshatot |
| 756/757 CE          | ?                                                                                            | 6                       | Several historical references ((al-Dhahabi, al-Suyuti, Mujir al-Din, and al-Ulaimi)                                                                  | Yes, damage reported in Jerusalem                                                                     |
| 796 CE              | Hellenic Arc?                                                                                | ?                       | Historical reference                                                                                                                                 | No                                                                                                    |
| 802/803 CE          | Cypriot Arc/East Anatolia Fault                                                              | Unknown, probably small | Historical reference                                                                                                                                 | Probably not                                                                                          |
| 853/854 CE          | ?                                                                                            | Small, <6.0             | One secondary historical reference                                                                                                                   | Reportedly damaged Tiberias, no archaeological evidence for this                                      |
| 859/860 CE          | Earthquake along Hellenic Arc or Northern DSFT; local landslide between Antioch and          | >6.0                    | Historical references                                                                                                                                | No                                                                                                    |
| 873 CE              | DSF?                                                                                         | ?                       | Archaeological evidence, no historical evidence                                                                                                      | Archaeological evidence for earthquake damage at Qasr Tilah,                                          |
| 881/882 CE          | ?                                                                                            | ?                       | Historical references to tsunami at Akko and coastal flooding at Alexandria                                                                          | ?                                                                                                     |

| Recorded Tsunami/coastal flooding?                                                                                                                                                                 | Tsunami likely along southern Levant | Likely responsible for this deposit?                                                                                              | Reference |
|----------------------------------------------------------------------------------------------------------------------------------------------------------------------------------------------------|--------------------------------------|-----------------------------------------------------------------------------------------------------------------------------------|-----------|
| No                                                                                                                                                                                                 | No                                   | No (fits radiocarbon data, but does not fit archaeological constraints)                                                           | [108,125] |
| No                                                                                                                                                                                                 | Possible                             | Unlikely (too soon for Umayyad archaeological fill to develop)                                                                    | [108,126] |
| Yes, but specific coastline not named by chronicler (Michael the Syrian); Severus ibn al-Muqaffa' says: it affected the entire near east from Gaza to the furthest extremity of Persia, many ships | Yes                                  | Yes (fits radiocarbon data and stratigraphic constraints, and associated with historical mention of coastal flooding/tsunami)     | [108,126] |
| No                                                                                                                                                                                                 | Unlikely, but possible               | Unlikely (no historical mention of coastal flooding/tsunami and the estimated earthquake magnitude is barely enough to generate a | [125]     |
| No                                                                                                                                                                                                 | Unlikely                             | No (no tsunami reference or damage reported in the Levant)                                                                        | [125]     |
| Yes, tsunami said to have affected Iskenderun Bay, Asia Minor                                                                                                                                      | Unlikely                             | No (a small earthquake that far away would be unlikely to have generated a tsunami along Israel's coast)                          | [108]     |
| No                                                                                                                                                                                                 | Unlikely                             | No (no tsunami reference, earthquake event not reliable, earthquake probably too small)                                           | [108,125] |
| Yes, but in far northern Levant coast                                                                                                                                                              | Possible                             | No (tsunami too localized to reach Israel)                                                                                        | [108,125] |
| No                                                                                                                                                                                                 | No                                   | No (no historical mentions of tsunami, or even of an earthquake)                                                                  | [127]     |
| Possible tsunami at Akko                                                                                                                                                                           | Possible                             | Unlikely (too late in the ninth century)                                                                                          | [108]     |

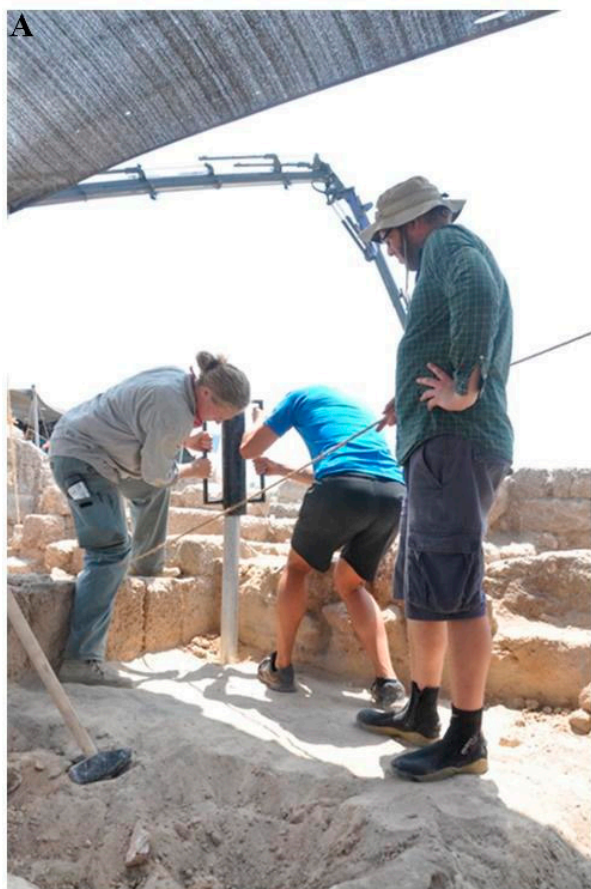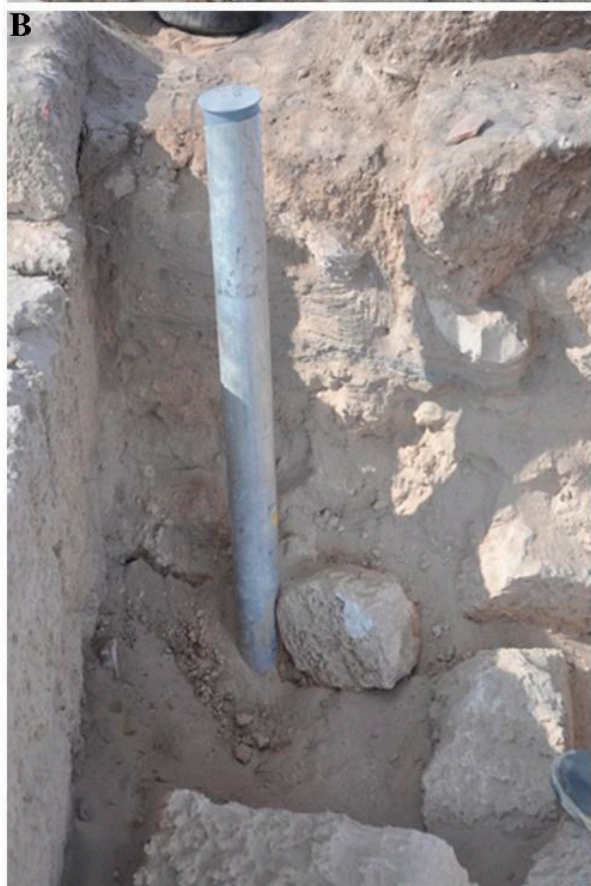

**Figure S4. Coring the anomalous sediment.** (A) The process of coring with a fence driver. (B) Aluminum coring pipe waiting for exposure during the excavation.

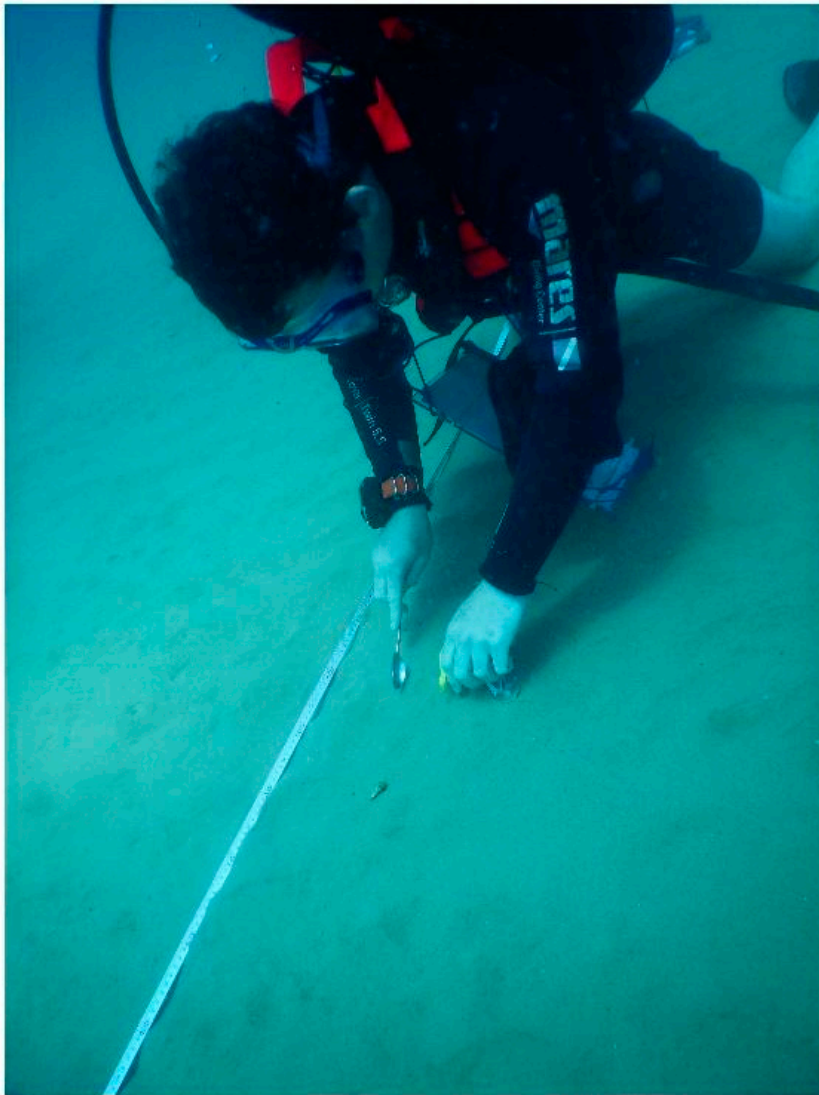

**Figure S5. Shallow marine surface sample collection.** Several surface samples were collected by diving to the seafloor at ~10 meters' depth offshore Sdot Yam, Israel. The upper centimeter of sediment was collected with a spoon and bagged.

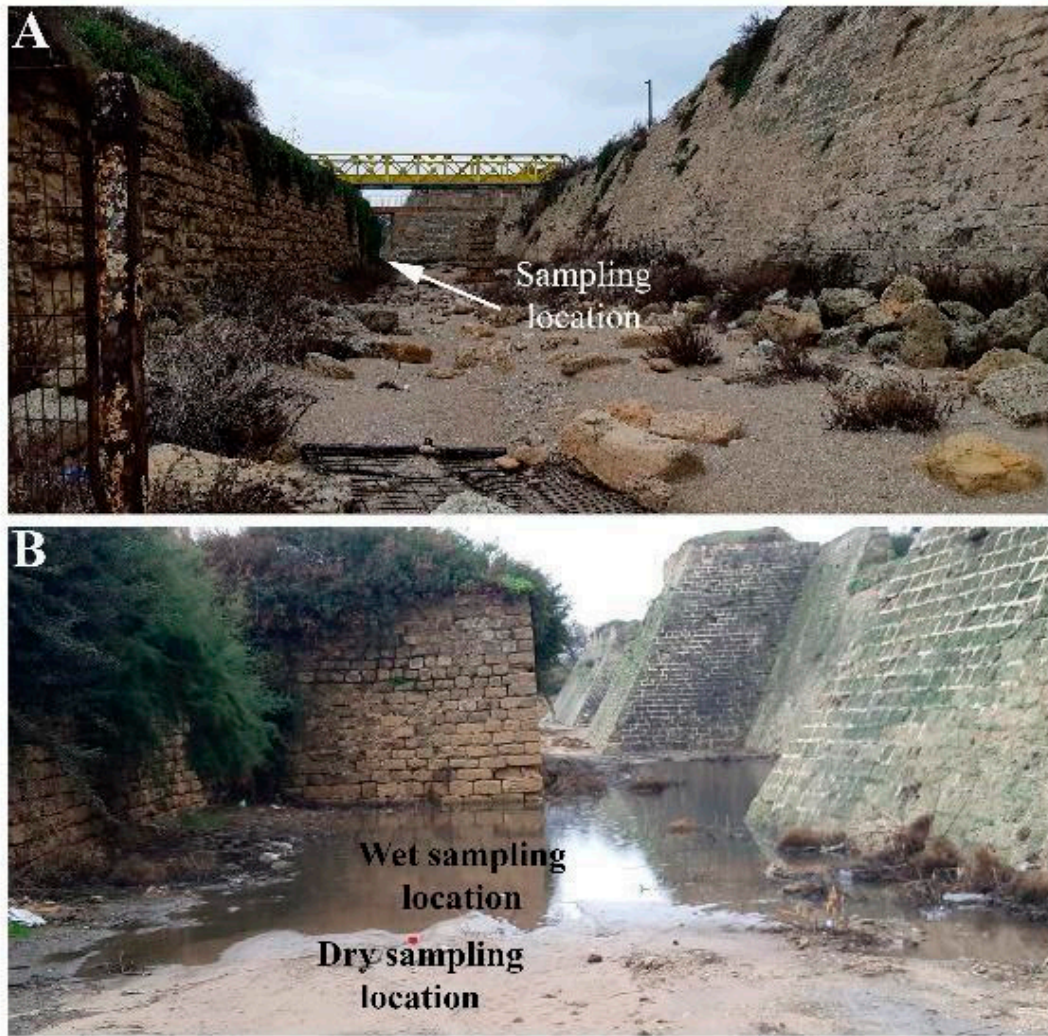

**Figure S6. Storm-deposited sample collection.** (A) Surface sediment collection site within the northern wall of the Crusader moat surrounding Caesarea Maritima National Park. (B) Samples were collected after a winter storm in January 2020 that transported and deposited a sand layer within the moat (one sample from the dry surface of the fresh deposit and one from the submerged surface).
